# Supplementary material
Source: MDPI journal article supplement (https://www.mdpi.com/2073-4344/11/8/907)
Supplement: s1 [file s1]

# Efficient CO<sub>2</sub> electroreduction on tin modified cuprous oxide synthesized via a one-pot microwave-assisted route

Juqin Zeng <sup>\*1</sup>, Marco Fontana <sup>1</sup>, Micaela Castellino <sup>2</sup>, Adriano Sacco <sup>1</sup>, M.Amin Farkhondehfal <sup>1</sup>, Filippo Drago <sup>3</sup> and Candido Fabrizio Pirri <sup>1,2</sup>

<sup>1</sup>Center for Sustainable Future Technologies @POLITO, Istituto Italiano di Tecnologia, Via Livorno 60, 10144 Turin, Italy

<sup>2</sup>Department of Applied Science and Technology, Politecnico di Torino, C.so Duca degli Abruzzi 24, 10129 Turin, Italy

<sup>3</sup>NanoChemistry, Istituto Italiano di Tecnologia, via Morego 30, 16163 Genoa, Italy

\*Correspondence: juqin.zeng@iit.it

**Keywords:** Carbon dioxide conversion; electrocatalysis; cuprous oxide; tin; overpotential

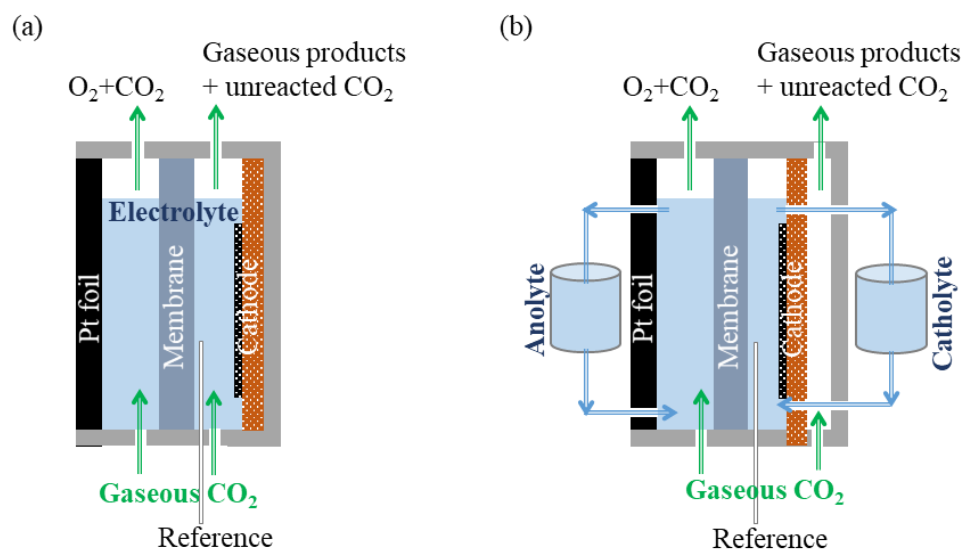

**Scheme S1.** Electrochemical cells for the CO<sub>2</sub> electrolysis: (a) batch cell and (b) semi-flow cell

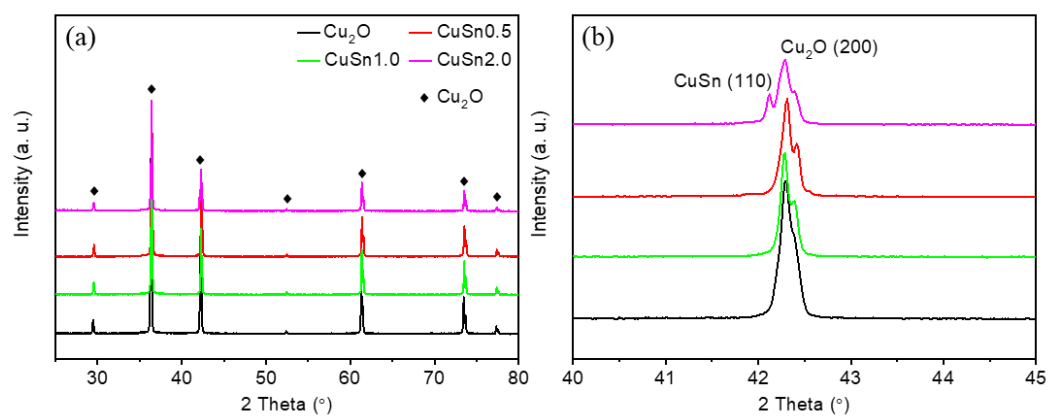

**Figure S1.** XRD patterns of  $\text{Cu}_2\text{O}$ ,  $\text{CuSn0.5}$ ,  $\text{CuSn1.0}$  and  $\text{CuSn2.0}$  samples (a) and a view of (200) peak (b).

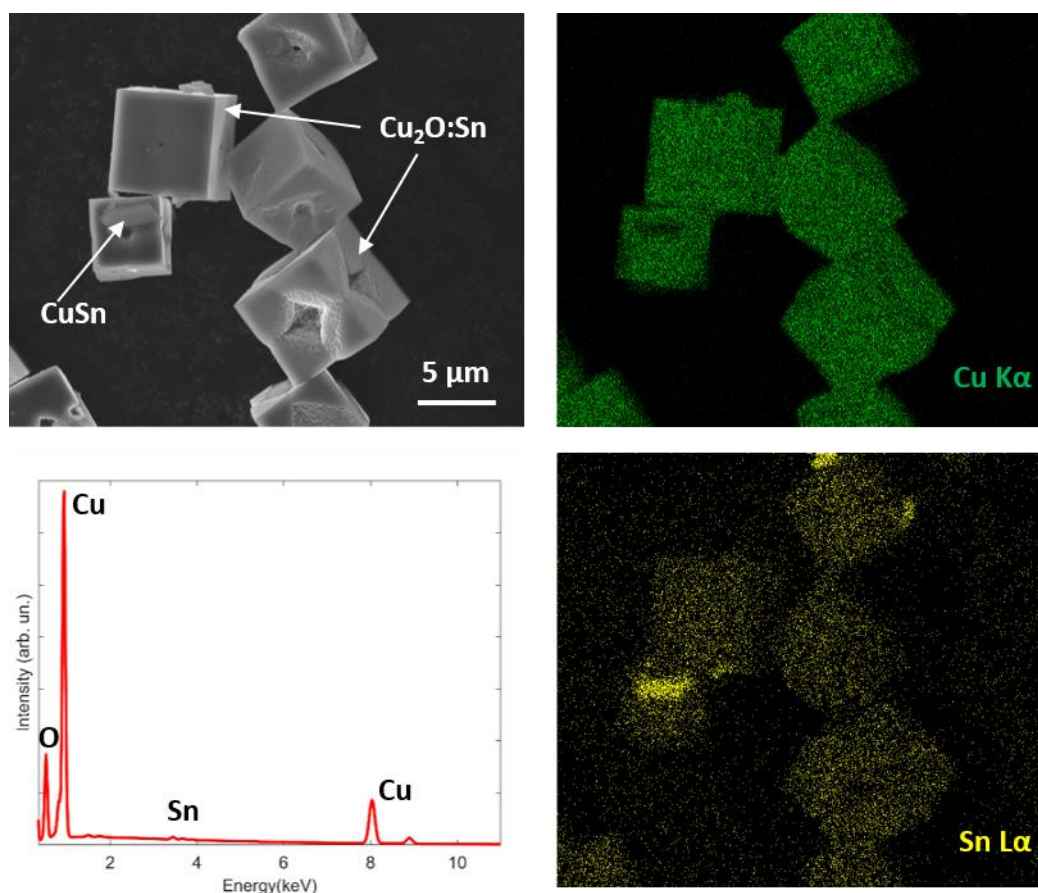

**Figure S2.** EDX characterization of the region of sample Sn-Cu<sub>2</sub>O depicted in the FESEM image, consisting of an EDX spectrum, Cu K $\alpha$  and Sn L $\alpha$  elemental maps.

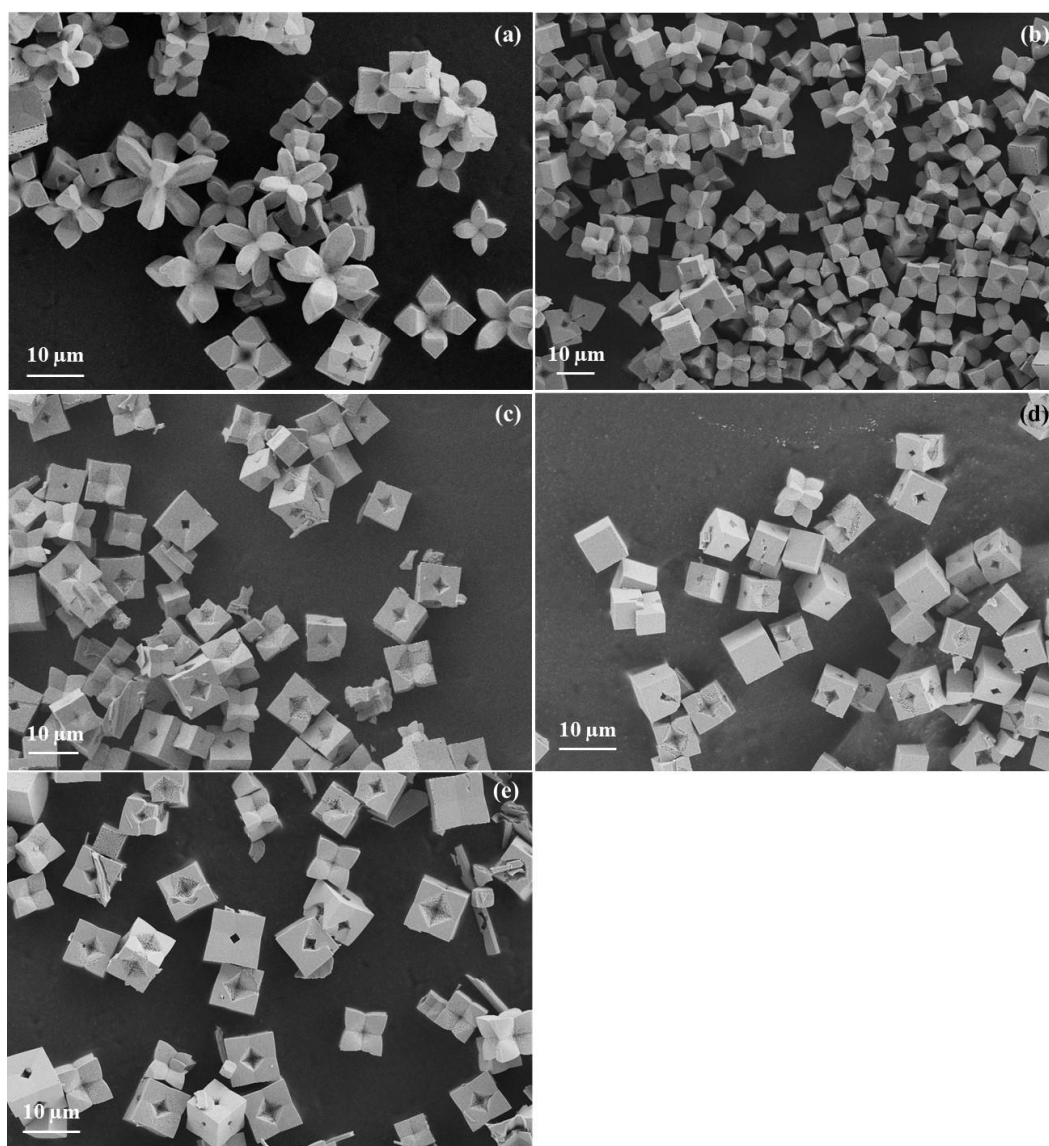

**Figure S3.** FESEM images of the samples. (a) Cu<sub>2</sub>O, (b) CuSn<sub>0.5</sub>, (c) CuSn<sub>1.0</sub>, (d) Sn-Cu<sub>2</sub>O and (e) CuSn<sub>2.0</sub>.

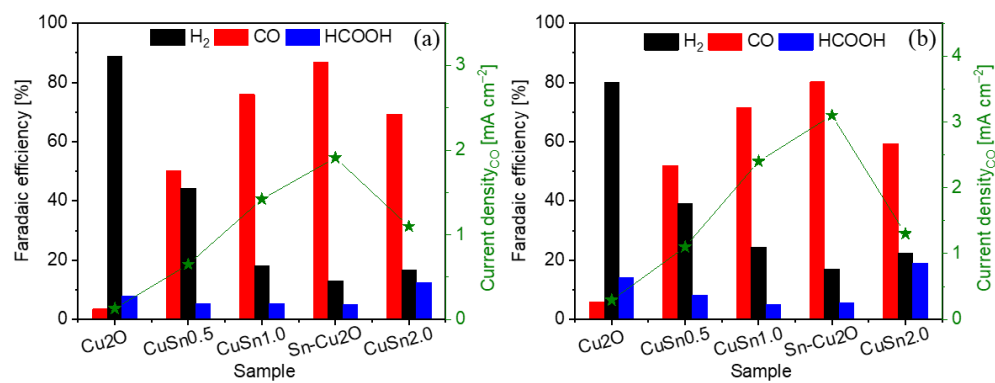

**Figure S4.** CO<sub>2</sub>RR in a batch cell in a CO<sub>2</sub>-saturated 0.1 M KHCO<sub>3</sub> aqueous solution on various samples. The dark green line is a guide to the eye for CO partial current density.

**Table S1.** Current density for CO formation on the Sn-Cu<sub>2</sub>O electrode at various potentials in different electrolytes.

| <b>Electrolyte<br/>(KHCO<sub>3</sub>)</b> | <b>0.1 M</b>                                            | <b>0.5 M</b>                                            | <b>1.0 M</b>                                            | <b>2.0 M</b>                                            |
|-------------------------------------------|---------------------------------------------------------|---------------------------------------------------------|---------------------------------------------------------|---------------------------------------------------------|
| Potential<br>(V vs. RHE)                  | Current density <sub>CO</sub><br>(mA cm <sup>-2</sup> ) |
| -0.35                                     | 0.097                                                   | 0.14                                                    | 0.28                                                    | 0.36                                                    |
| -0.4                                      | 0.25                                                    | 0.33                                                    | 0.47                                                    | 0.68                                                    |
| -0.45                                     | 0.52                                                    | 0.73                                                    | 0.88                                                    | 0.98                                                    |
| -0.5                                      | 0.78                                                    | 1.37                                                    | 1.82                                                    | 1.88                                                    |
| -0.55                                     | 1.27                                                    | 2.03                                                    | 2.61                                                    | 3.36                                                    |
| -0.6                                      | 1.76                                                    | 3.88                                                    | 5.45                                                    | 6.23                                                    |
| -0.7                                      | 3.17                                                    | 5.95                                                    | 11.25                                                   | 12.28                                                   |
| -0.8                                      | 4.87                                                    | 9.09                                                    | 16.73                                                   | 24.40                                                   |
| -0.9                                      | 9.90                                                    | 14.80                                                   | 22.66                                                   | 36.38                                                   |
| -1.0                                      | 13.87                                                   | 22.00                                                   | 29.30                                                   | 47.16                                                   |

**Table S2.** Faradaic efficiency for CO formation on the Sn-Cu<sub>2</sub>O electrode at various potentials in different electrolytes.

| <b>Electrolyte<br/>(KHCO<sub>3</sub>)</b> | <b>0.1 M</b>                   | <b>0.5 M</b>                   | <b>1.0 M</b>                   | <b>2.0 M</b>                   |
|-------------------------------------------|--------------------------------|--------------------------------|--------------------------------|--------------------------------|
| <b>Potential<br/>(V vs. RHE)</b>          | <b>FE<sub>CO</sub><br/>(%)</b> | <b>FE<sub>CO</sub><br/>(%)</b> | <b>FE<sub>CO</sub><br/>(%)</b> | <b>FE<sub>CO</sub><br/>(%)</b> |
| -0.35                                     | 45                             | 42                             | 72                             | 51                             |
| -0.4                                      | 56                             | 58                             | 79                             | 55                             |
| -0.45                                     | 79                             | 70                             | 81                             | 64                             |
| -0.5                                      | 84                             | 78                             | 81                             | 70                             |
| -0.55                                     | 85                             | 85                             | 83                             | 74                             |
| -0.6                                      | 90                             | 87                             | 86                             | 75                             |
| -0.7                                      | 90                             | 90                             | 83                             | 79                             |
| -0.8                                      | 90                             | 89                             | 80                             | 76                             |
| -0.9                                      | 82                             | 88                             | 76                             | 71                             |
| -1.0                                      | 80                             | 83                             | 73                             | 68                             |



**Table S3.** Comparison of different CuSn-based electrocatalysts in liquid-phase CO<sub>2</sub> electrolysis.

| Electrocatalyst                | Potential<br>(V vs RHE) | Electrolyte             | $j_{\text{CO}}$<br>(mA cm <sup>-2</sup> ) | FE <sub>CO</sub><br>(%) | Reference |
|--------------------------------|-------------------------|-------------------------|-------------------------------------------|-------------------------|-----------|
| Electrodeposited Cu-Sn         | -0.6                    | 0.1 M KHCO <sub>3</sub> | 0.9                                       | 90                      | 1         |
| Dendritic Cu-Sn                | -0.8                    | 0.1 M KHCO <sub>3</sub> | 4.7                                       | 90                      | 2         |
| Electrodeposited Cu-Sn         | -0.99                   | 0.1 M KHCO <sub>3</sub> | 0.9                                       | 60                      | 3         |
| Dendritic Cu-Sn                | -1.1                    | 0.1 M KHCO <sub>3</sub> | 11.5                                      | 75                      | 4         |
| 3D-hierarchical Cu-Sn          | -1.0                    | 0.1 M KHCO <sub>3</sub> | 9.6                                       | ≈70                     | 5         |
| Cu/patterned-Sn                | -1.0                    | 0.1 M KHCO <sub>3</sub> | 1.9                                       | 58                      | 6         |
| Core/Shell Cu/SnO <sub>2</sub> | -0.7                    | 0.5 M KHCO <sub>3</sub> | ≈4.3                                      | 93                      | 7         |
| Sn/Cu-Nanofiber-GDE            | -1.2                    | 0.1 M KHCO <sub>3</sub> | 100                                       | ≈80                     | 8         |
| Sn-Cu <sub>2</sub> O           | -1.0                    | 2.0 M KHCO <sub>3</sub> | 47                                        | 70                      | This work |
| Sn-Cu <sub>2</sub> O           | -0.7                    | 0.5 M KHCO <sub>3</sub> | 5.9                                       | 90                      | This work |

## References

1. Sarfraz, S.; Garcia-Esparza, A.T.; Jedidi, A.; Cavallo, L.; Takanabe, K. Cu-Sn Bimetallic Catalyst for Selective Aqueous Electroreduction of CO<sub>2</sub> to CO. *ACS Catal.* **2016**, *6*, 2842-2851.
2. Zeng, J.; Bejtka, K.; Ju, W.; Castellino, M.; Chiodoni, A.; Sacco, A.; Farkhondeh, M.A.; Hernández, S.; Rentsch, D.; Battaglia, C.; Pirri, C.F. Advanced Cu-Sn foam for selectively converting CO<sub>2</sub> to CO in aqueous solution. *Appl. Catal. B Environ.* **2018**, *236*, 475-482.
3. Morimoto, M.; Takatsuji, Y.; Yamasaki, R.; Hashimoto, H.; Nakata, I.; Sakakura, T.; Haruyama, T. Electrodeposited Cu-Sn Alloy for Electrochemical CO<sub>2</sub> Reduction to CO/HCOO<sup>-</sup>. *Electrocatalysis*, **2018**, *9*, 323-332.
4. Ju, W.; Zeng, J.; Bejtka, K.; Ma, H.; Rentsch, D.; Castellino, M.; Sacco, A.; Pirri, C.F.; Battaglia, C. Sn-Decorated Cu for Selective Electrochemical CO<sub>2</sub> to CO Conversion: Precision Architecture beyond Composition Design. *ACS Appl. Energy Mater.* **2019**, *2*(1), 867-872.
5. Yoo, C.J.; Dong, W.J.; Park, J.Y.; Lim, J.W.; Kim, S.; Choi, K.S.; Ngome, F.O.O.; Choi, S.-Y.; Lee, J.-L. Compositional and Geometrical Effects of Bimetallic Cu-Sn Catalysts on Selective Electrochemical CO<sub>2</sub> Reduction to CO. *ACS Appl. Energy Mater.* **2020**, *3*, 4466-4473.
6. Dong, W.J.; Lim, J.W.; Hong, D.M.; Park, J.Y.; Cho, W.S.; Baek, S.; Yoo, C.J.; Kim, W.; Lee, J.-L. Evidence of Local Corrosion of Bimetallic Cu-Sn Catalysts and Its Effects on the Selectivity of Electrochemical CO<sub>2</sub> Reduction. *ACS Appl. Energy Mater.* **2020**, *3*, 10568-10577.
7. Li, Q.; Fu, J.; Zhu, W.; Chen, Z.; Shen, B.; Wu, L.; Xi, Z.; Wang, T.; Lu, G.; Zhu, J.J.; Sun, S. Tuning Sn-Catalysis for Electrochemical Reduction of CO<sub>2</sub> to CO via the Core/Shell Cu/SnO<sub>2</sub> Structure. *J. Am. Chem. Soc.* **2017**, *139*, 4290-4293.
8. Ju, W.; Jiang, F.; Ma, H.; Pan, Z.; Zhao, Y.-B.; Pagani, F.; Rentsch, D.; Wang, J.; Battaglia, C. Electrocatalytic Reduction of Gaseous CO<sub>2</sub> to CO on Sn/Cu-Nanofiber-Based Gas Diffusion Electrodes. *Adv. Energy Mater.* **2019**, *9*, 1901514.
